# Supplementary material for: Sulfanyl Porphyrazines with Morpholinylethyl Periphery—Synthesis, Electrochemistry, and Photocatalytic Studies after Deposition on Titanium(IV) Oxide P25 Nanoparticles
Source: MDPI journal article supplement (doi:10.3390/molecules26082280), 2021-04-15
Supplement: s1 [file s1]

# **Sulfanyl porphyrazines with morpholinylethyl periphery – synthesis, electrochemistry, and photocatalytic studies after deposition on titanium(IV) oxide P25 nanoparticles**

Tomasz Koczorowski<sup>a,\*</sup>, Wojciech Szczolko<sup>a</sup>, Anna Teubert<sup>b</sup>, Tomasz Goslinski<sup>a</sup>

<sup>a</sup> Department of Chemical Technology of Drugs, Poznan University of Medical Sciences, Grunwaldzka 6, 60-780 Poznan, Poland

<sup>b</sup> Institute of Bioorganic Chemistry, Polish Academy of Sciences, Z. Noskowskiego 12, 61-704 Poznan, Poland

\* Correspondence: tkoczorowski@ump.edu.pl (TK)

## **SUPPORTING INFORMATION**

### **Table of contents**

#### **NMR studies:**

|                                                                                                       |   |
|-------------------------------------------------------------------------------------------------------|---|
| <sup>1</sup> H NMR spectrum of <b>4</b> in pyridine- <i>d</i> <sub>5</sub> ...                        | 2 |
| <sup>13</sup> C NMR spectrum of <b>4</b> in pyridine- <i>d</i> <sub>5</sub> .....                     | 2 |
| <sup>1</sup> H- <sup>1</sup> H COSY NMR spectrum of <b>4</b> in pyridine- <i>d</i> <sub>5</sub> ..... | 3 |
| <sup>1</sup> H NMR spectrum of <b>5</b> in pyridine- <i>d</i> <sub>5</sub> .....                      | 4 |
| <sup>13</sup> C NMR spectrum of <b>5</b> in pyridine- <i>d</i> <sub>5</sub> .....                     | 4 |
| <sup>1</sup> H- <sup>1</sup> H COSY NMR spectrum of <b>5</b> in pyridine- <i>d</i> <sub>5</sub> ..... | 5 |

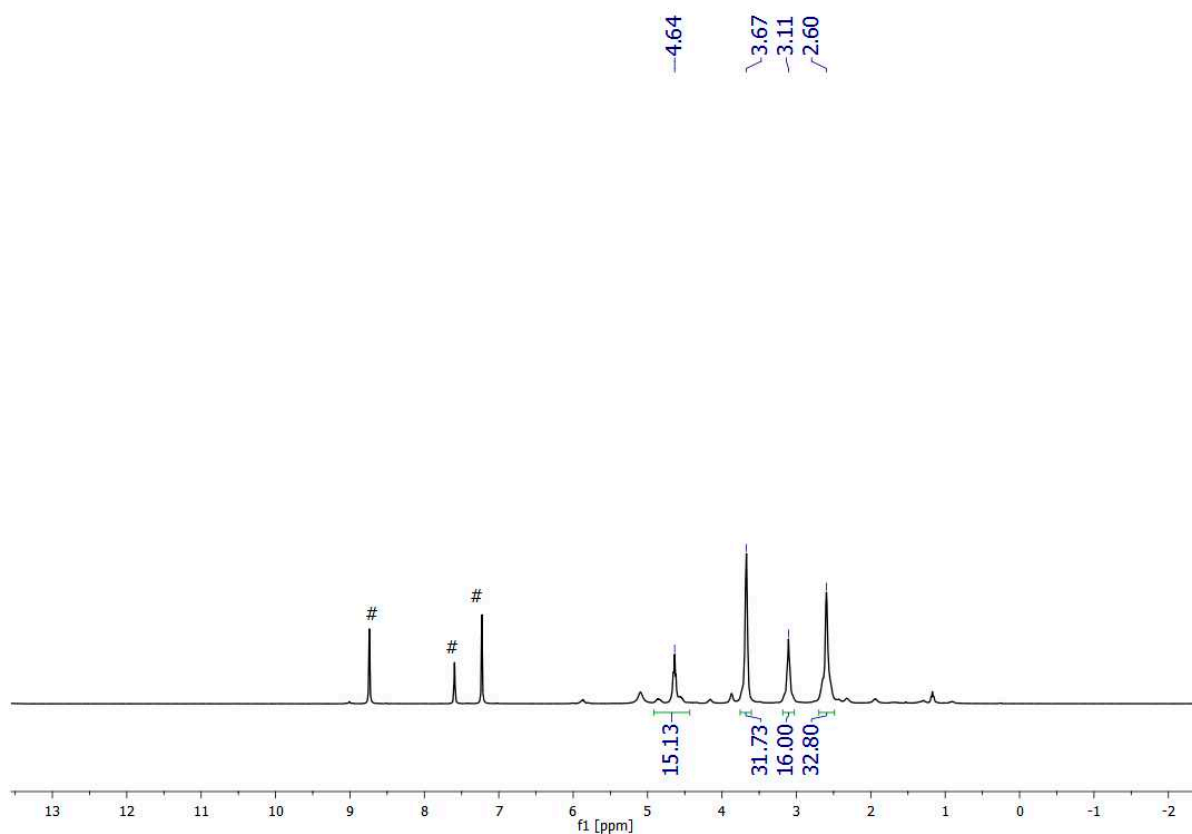

Figure S1.  $^1\text{H}$  NMR spectrum of **4** in pyridine- $d_5$ . # indicates solvent residual peaks.

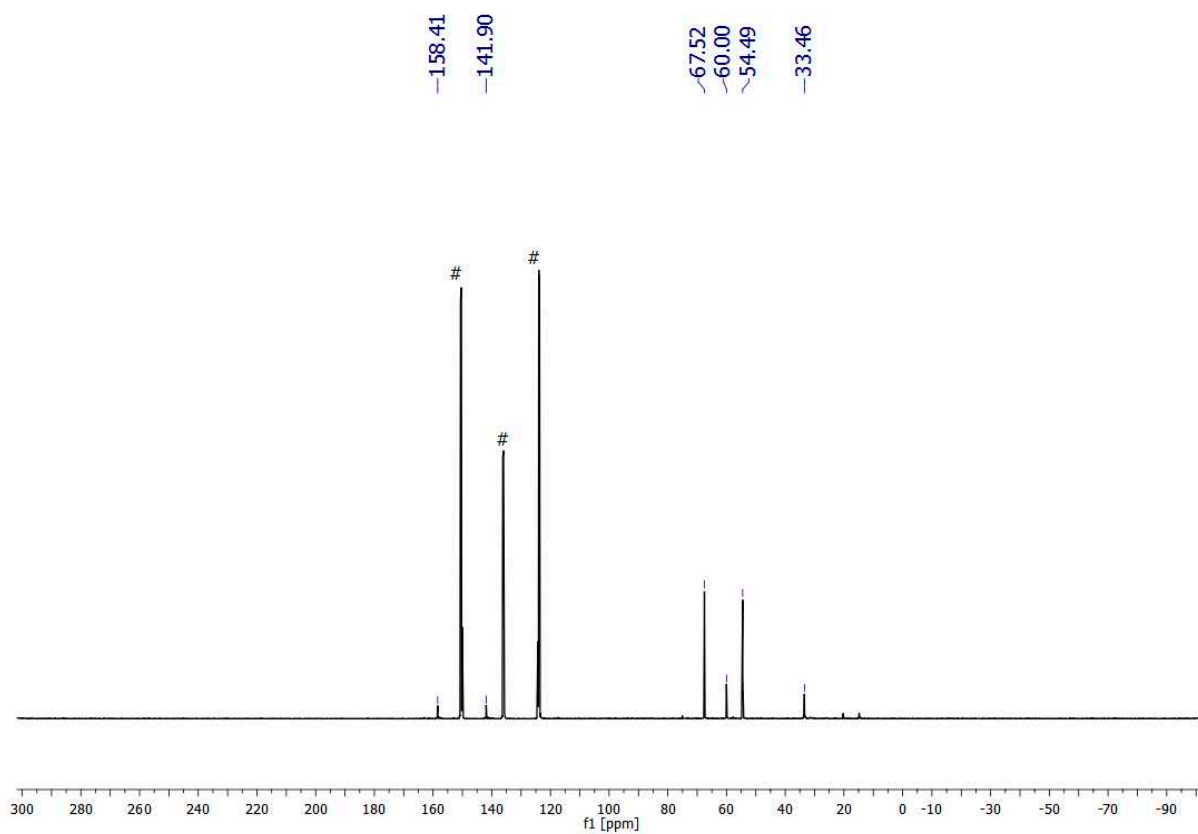

Figure S2.  $^{13}\text{C}$  NMR spectrum of **4** in pyridine- $d_5$ . # indicates solvent residual peaks.

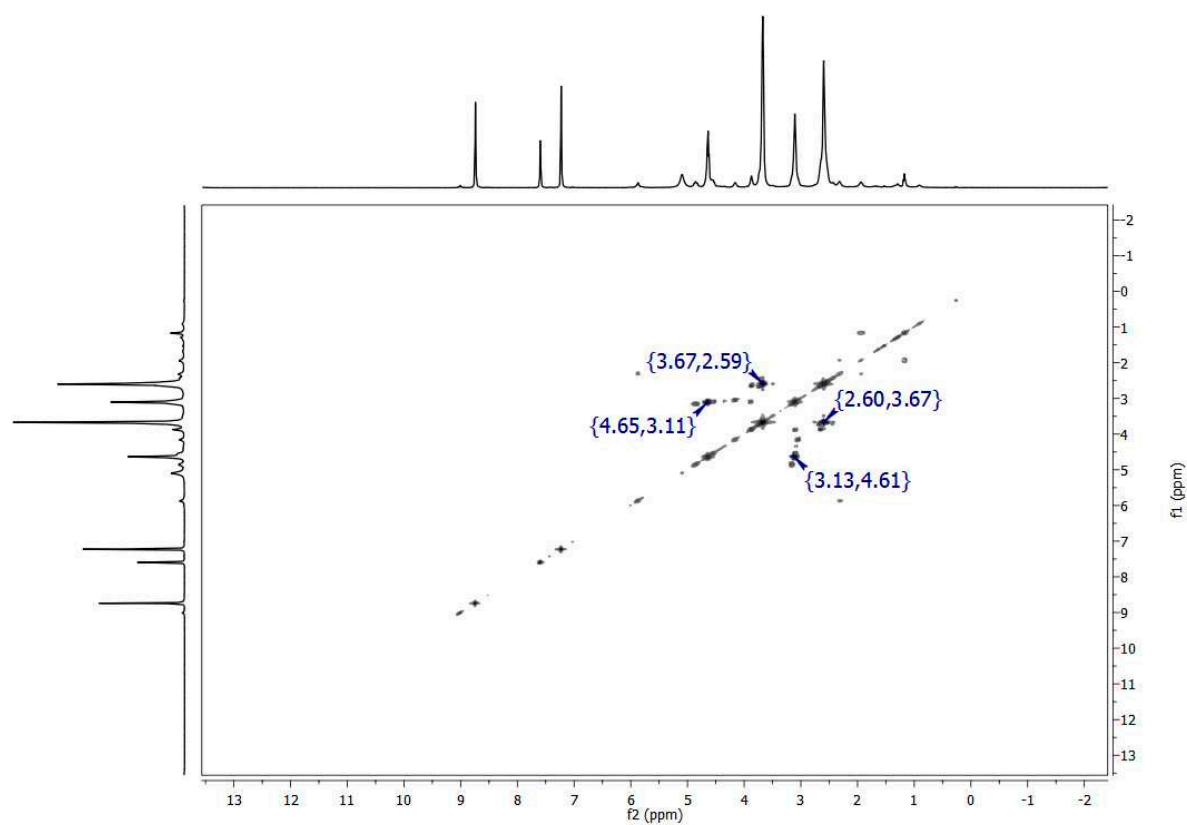

Figure S3.  $^1\text{H}$ - $^1\text{H}$  COSY NMR spectrum of **4** in pyridine- $d_5$ .

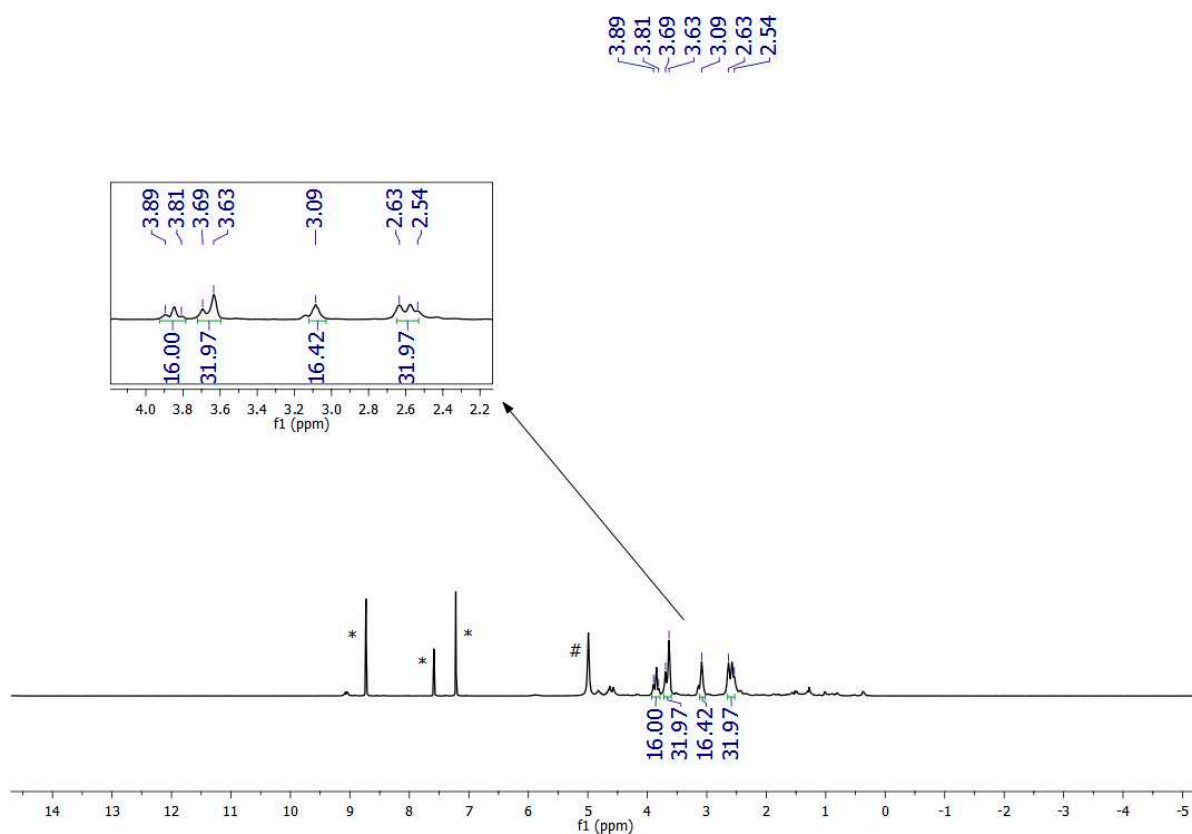

Figure S4.  $^1\text{H}$  NMR spectrum of **5** in  $\text{pyridine-}d_5$ . \* indicates solvent residual peaks and # stands for water residual.

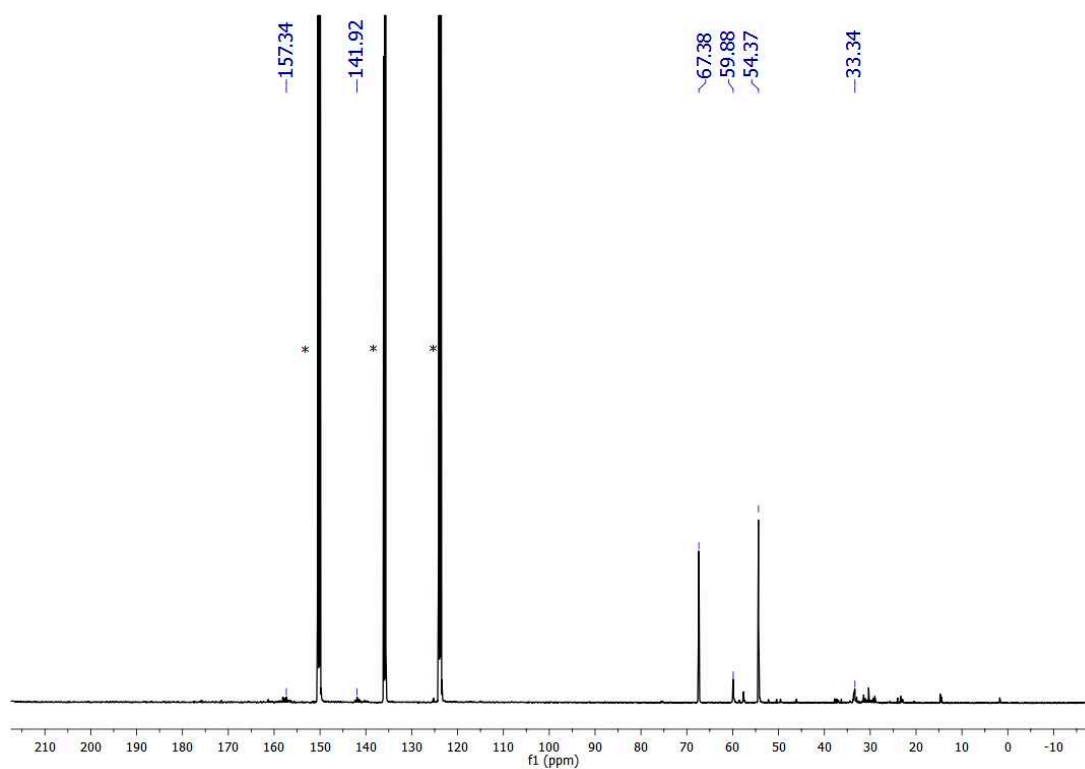

Figure S5.  $^{13}\text{C}$  NMR spectrum of **5** in  $\text{pyridine-}d_5$ . \* indicates solvent residual peaks.

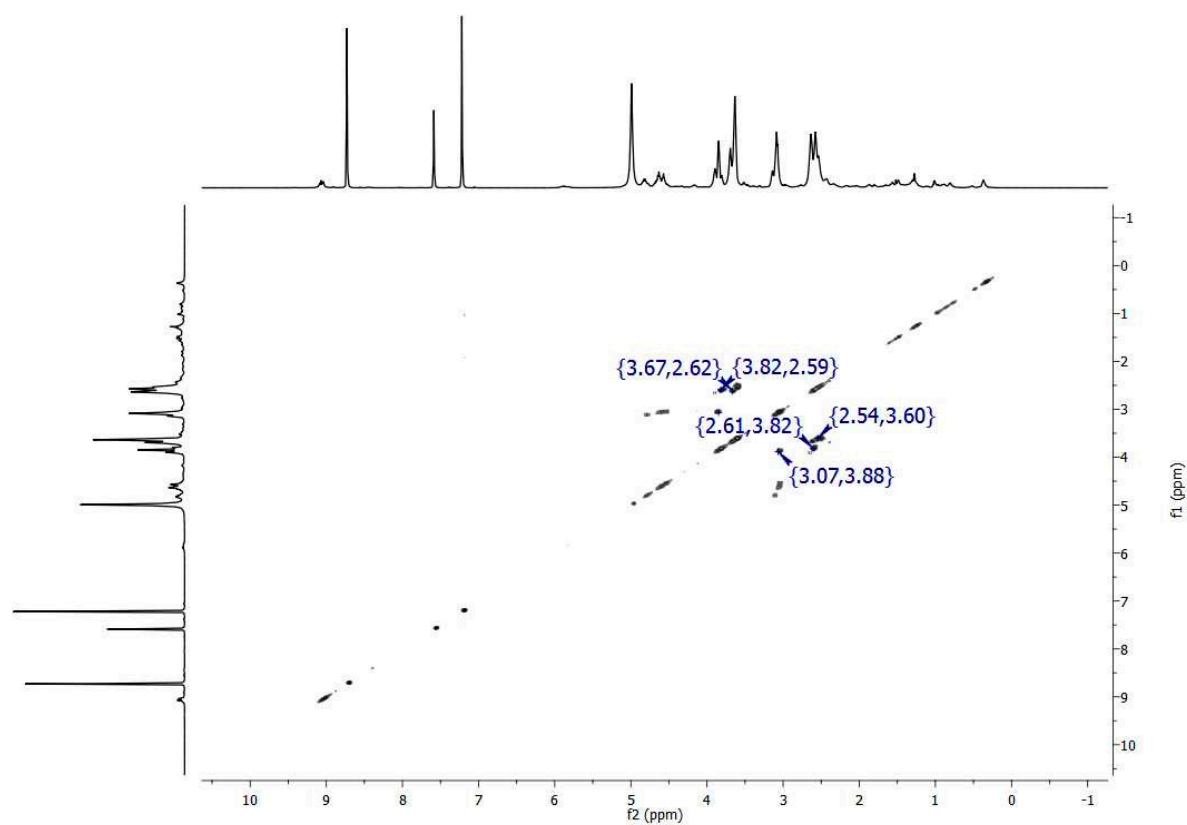

Figure S6.  $^1\text{H}$ - $^1\text{H}$  COSY NMR spectrum of **5** in pyridine- $d_5$ .
